# Supplementary material for: Regulation of Copper Metabolism by Nitrogen Utilization in Saccharomyces cerevisiae
Source: MDPI journal article supplement (doi:10.3390/jof7090756), 2021-09-14
Supplement: s1 [file s1]

**Table S1.** Primers used in this study.

| No. | Primer name                           | Sequence (5' → 3')               |
|-----|---------------------------------------|----------------------------------|
| 1   | <i>FTRI</i> _north_F                  | AGGCAATCGGGGAACATGAC             |
| 2   | <i>FTRI</i> _north_R                  | CCAATCTCCACCAACGACCG             |
| 3   | <i>FET3</i> _north_F                  | CCTTCTTGACGCAATGTCCAAT           |
| 4   | <i>FET3</i> _north_R                  | TACGTCGTATCGGGCTGGA              |
| 5   | <i>ACT1</i> _north_F                  | ACTGAAGCTCCAATGAACCCT            |
| 6   | <i>ACT1</i> _north_R                  | CAGCAGTGGTGGAGAAAGAGT            |
| 7   | <i>FRE1</i> _north_F                  | GCTCATGGCGAACGAGACAG             |
| 8   | <i>FRE1</i> _north_R                  | GACCCTTGCCTCGAGTTGTA             |
| 9   | <i>CTRL</i> _north_F                  | CAGTAGCATCGAGTATGGCGT            |
| 10  | <i>CTRL</i> _north_R                  | TCCATCCCTGAAGAGCTACTGT           |
| 11  | <i>MAC1</i> _north_F                  | TGCACAAATTGAAGGTGACTGC           |
| 12  | <i>MAC1</i> _north_R                  | GGCTTCGCTCTTTCTTCTCAC            |
| 13  | T7                                    | TAATACGACTCACTATAGGG             |
| 14  | <i>MAC1</i> _del_stop_ <i>Xho1</i> _R | TCCTCGAGTGAAGTGGTGGCATCGCTTAG    |
| 15  | 3HA_ <i>Xho1</i> _R                   | GATCCTCGAGCGGATCCCCGGCTTAATTAACA |
| 16  | 3HA_ <i>Kpn1</i> _R                   | GATCGGTACCCCGGTAGAGGTGTGGTCAATAA |
